# Supplementary material
Source: PubMed Central journal article supplement (PMC4501475)
Supplement: NIHMS671533-supplement-supp.pdf [file NIHMS671533-supplement-supp.pdf]

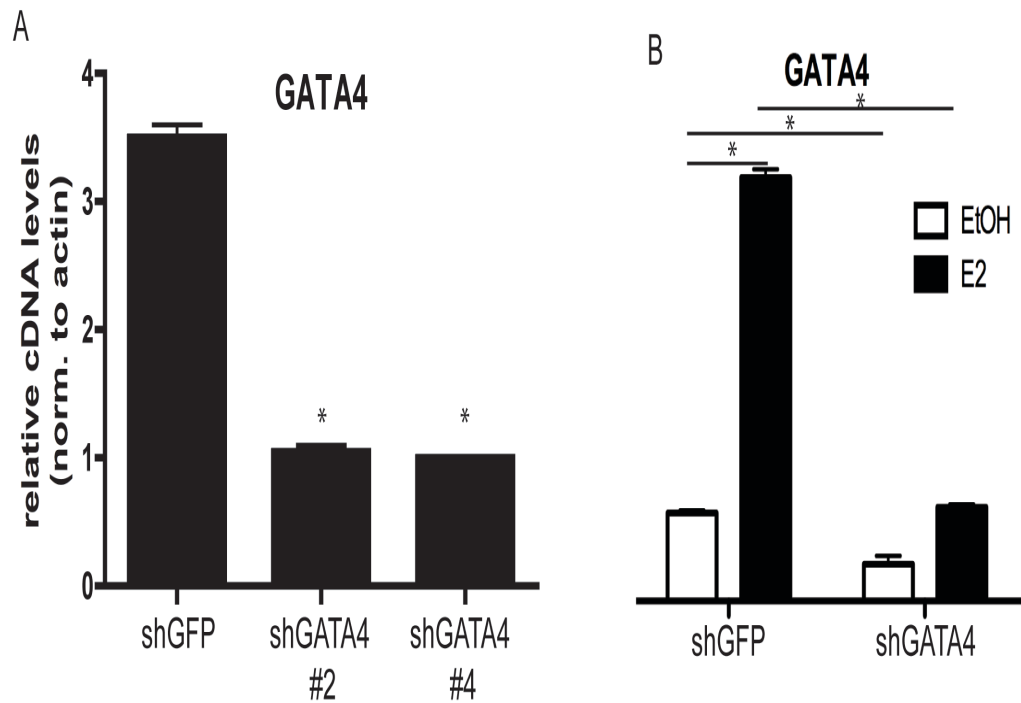

(A) Two different lentiviruses successfully knockdown *Gata4* mRNA. Calvarial osteoblasts were infected with lentivirus expressing either shGFP or shGATA4 clone #2 or #4. Cells were then differentiated for two weeks and RNA was obtained. qPCR was performed for *Gata4* and normalized to actin mRNA.

(B) Calvarial osteoblasts were infected with lentivirus expressing either shGFP or shGATA4 clone #2. Cells were then differentiated for two weeks, treated with 10 nM E2 for 24 hours, and then RNA was obtained. qPCR was performed for *Gata4* and normalized to actin mRNA.

## Supplemental Fig. 2

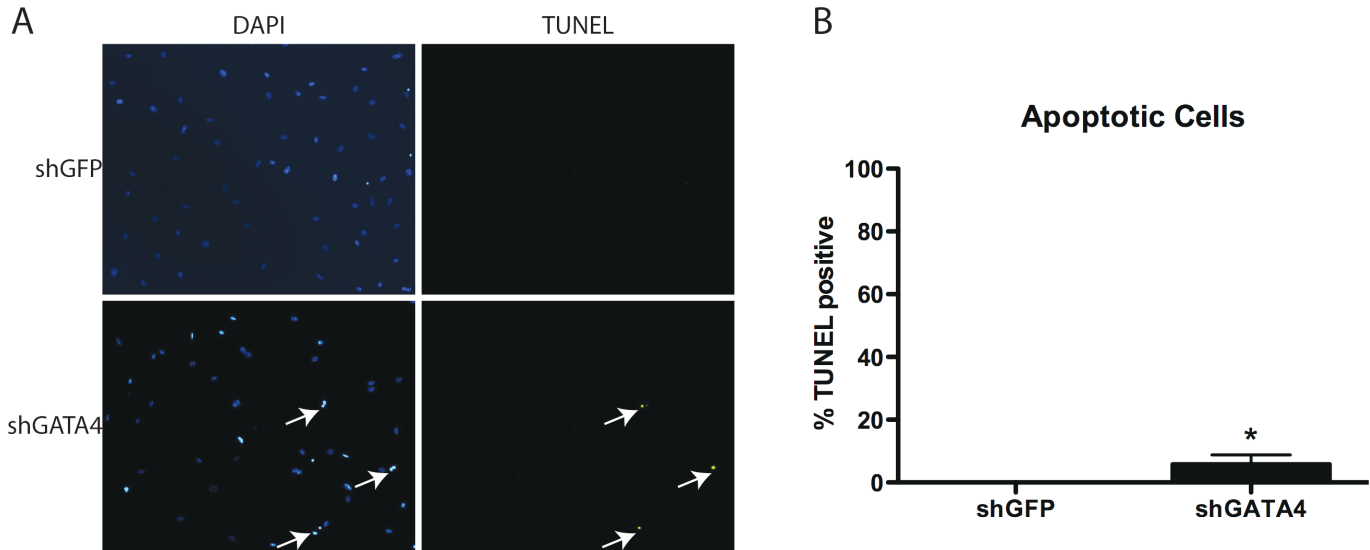

- (A) Calvarial osteoblasts were infected with lentivirus expressing either shGFP or shGATA4. TUNEL was performed and cells were counterstained with DAPI.
- (B) Multiple wells from part (A) were quantified.

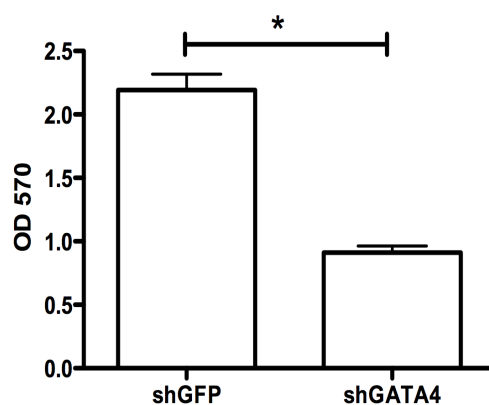

An independent shRNA targeting of *Gata4* (shGATA4 #4) also yielded a significant reduction in mineralization. Calvarial osteoblasts were infected with lentivirus expressing either shGFP or shGATA4 clone #4. Cells were then differentiated for two weeks. Cells were then fixed and stained using alizarin red. Alizarin red was eluted and the mineral content was measured at an OD of 570. Silencing was performed in three wells and the average OD is displayed. Experiments were then performed in triplicate.

\*  $P < .05$ .

Supplemental Fig. 4

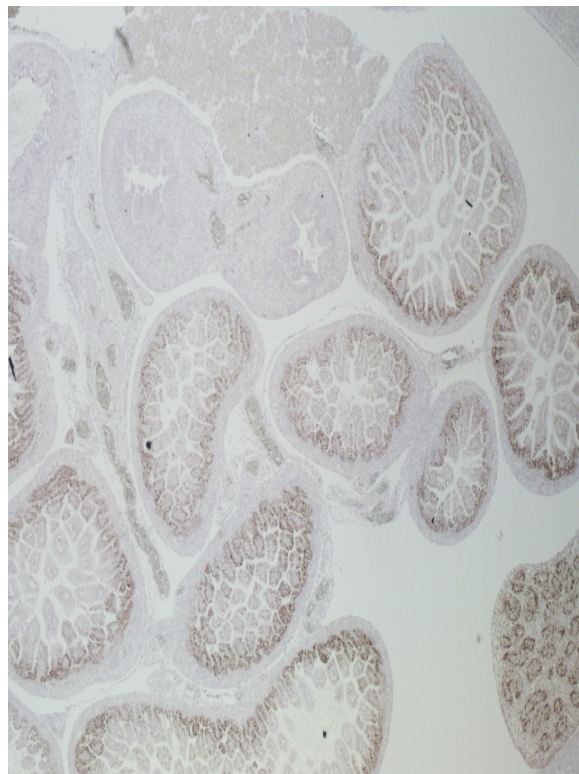

GATA4 *in situ* analysis. E18.5 embryos were probed for *Gata4* expression. The highest level of staining was seen in the intestines shown here.

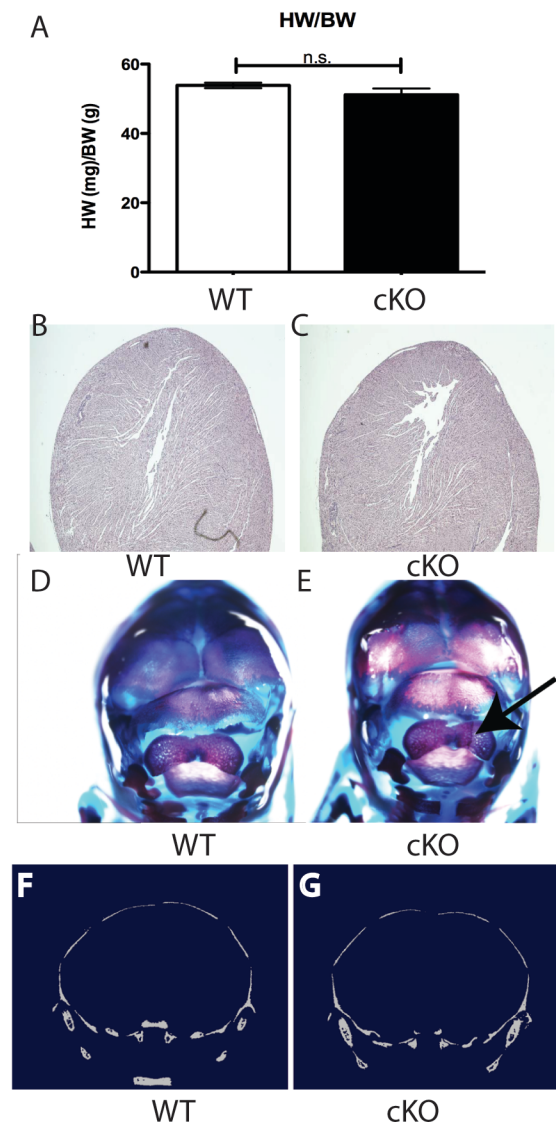

(A) Heart weight/body weight (HW/BW) in wildtype (WT) and cKO mice.

(B and C) H&E staining of hearts from WT and cKO mice.

(D and E) Skeletal preparations of E18.5 mice reveal skull defects (arrow) in cKO mice.

(F and G) microCT images of WT (F) and cKO (G) skulls.

Supplemental Fig. 6

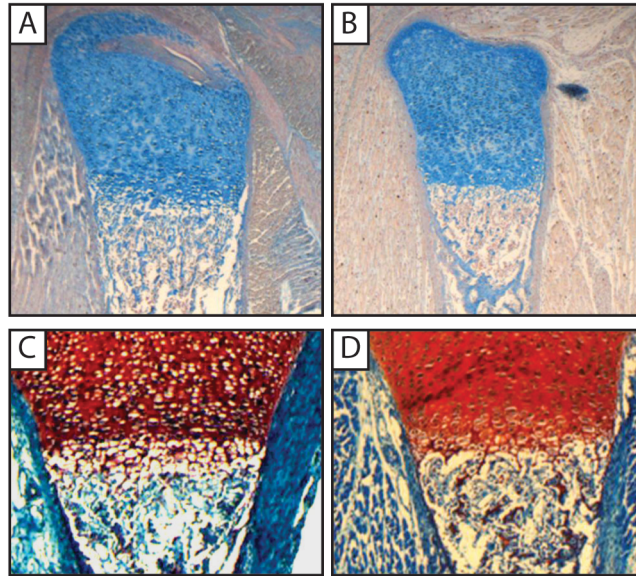

(A-B) Alcian Blue staining of femurs from WT (A) and cKO (B) P0 mice.  
(C-D) Safranin O staining of femurs from WT (C) and cKO (D) P0 mice.

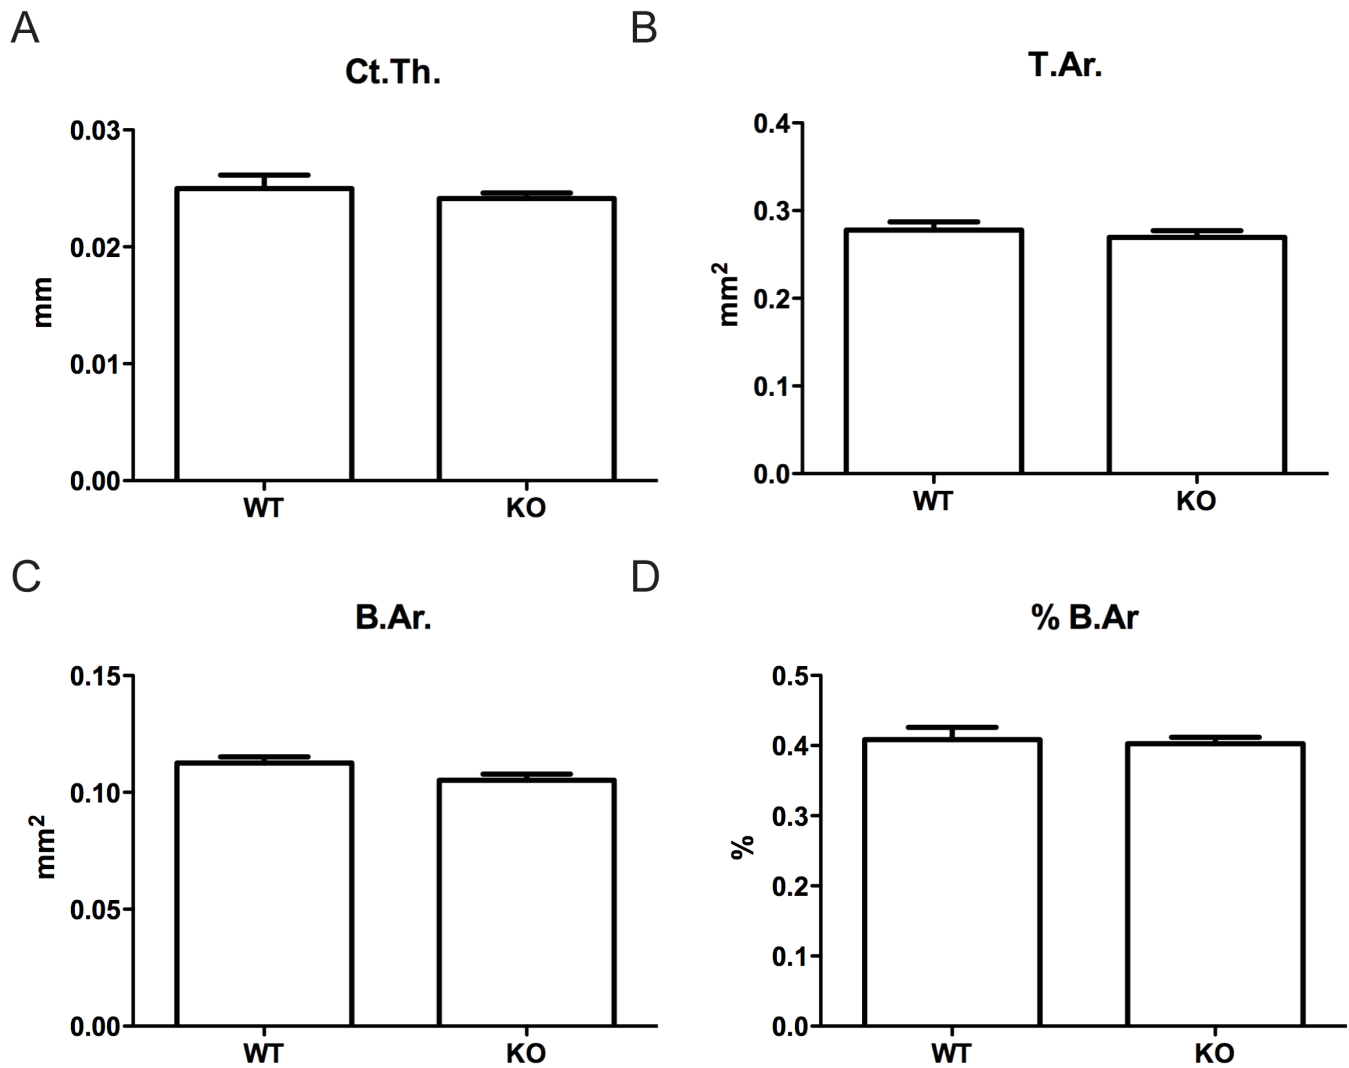

**Comparison of cortical bone structure in P0 WT and cKO mice assessed by  $\mu$ CT**

(A) Cortical thickness (Ct.Th.), (B) Total Area (T. Ar.), (C) Bone Area (B.Ar.) and (D) percent bone area (% B.Ar.). N=9

Supplemental Fig. 8

Most decreased after  
shGATA4

| Gene    | Gene Name                                                                       | DiffScore |
|---------|---------------------------------------------------------------------------------|-----------|
| Ibsp    | integrin binding sialoprotein                                                   | -347.0    |
| Akp2    | alkaline phosphatase, liver/bone/kidney (Alpl)                                  | -346.4    |
| Prss35  | protease, serine, 35                                                            | -346.4    |
| Bglap   | bone gamma carboxyglutamate protein (osteocalcin)                               | -265.0    |
| Phex    | Phosphate regulating gene with homologies to endopeptidases on the X chromosome | -200.9    |
| Bmp3    | bone morphogenetic protein 3                                                    | -194.8    |
| Igfbp3  | insulin-like growth factor binding protein 3                                    | -126.2    |
| Igfbp5  | insulin-like growth factor binding protein 5                                    | -93.0     |
| Dlk1    | delta-like 1 homolog                                                            | -65.4     |
| Chrd    | chordin                                                                         | -59.1     |
| Sox9    | SRY-box containing gene 9                                                       | -57.1     |
| Foxc1   | forkhead box C1                                                                 | -47.7     |
| Rbp4    | retinol binding protein 4                                                       | -43.9     |
| Fgfr2   | fibroblast growth factor receptor 2                                             | -35.3     |
| Kazald1 | Kazal-type serine peptidase inhibitor domain 1                                  | -31.2     |
| Col11a1 | collagen, type XI, alpha 1                                                      | -27.1     |
| Sort1   | sortilin 1                                                                      | -27.0     |
| Insig2  | insulin induced gene 2                                                          | -26.7     |
| BmpR1a  | bone morphogenetic protein receptor, type 1A                                    | -20.4     |
| Smad5   | MAD homolog 5                                                                   | -17.3     |
| Mmp13   | matrix metalloproteinase 13                                                     | -15.4     |
| Thra    | thyroid hormone receptor alpha                                                  | -14.7     |
| Sp7     | Sp7 transcription factor 7 (osterix)                                            | -13.1     |
| Ror2    | receptor tyrosine kinase-like orphan receptor 2                                 | -11.4     |
| Bmp4    | bone morphogenetic protein 4                                                    | -11.3     |
| Smad3   | MAD homolog 3                                                                   | -10.3     |
| Insig1  | insulin induced gene 1                                                          | -10.3     |
| Smo     | smoothed homolog                                                                | -10.2     |
| Tgfr1   | transforming growth factor, beta receptor I                                     | -9.6      |
| Msx1    | homeobox, msh-like 1                                                            | -9.3      |
| Cbfb    | core binding factor beta                                                        | -8.9      |
| Mef2c   | myocyte enhancer factor 2C                                                      | -8.4      |
| Hspg2   | perlecan (heparan sulfate proteoglycan 2)                                       | -7.0      |
| Tgfr2   | transforming growth factor, beta receptor II                                    | -6.4      |
| Ltbp3   | latent transforming growth factor beta binding protein 3                        | -6.0      |
| Osr2    | odd-skipped related 2                                                           | -6.0      |
| Bmp6    | bone morphogenetic protein 6                                                    | -5.9      |
| Fgfr1   | fibroblast growth factor receptor 1                                             | -5.7      |
| Foxc2   | forkhead box C2                                                                 | -5.6      |
| Znr1    | zinc ribbon domain containing, 1                                                | -5.2      |
| Col9a1  | collagen, type IX, alpha 1                                                      | -3.2      |
| Bcl2    | B-cell leukemia/lymphoma 2                                                      | -3.2      |

Less decreased after  
shGATA4



Supplemental Fig. 9

| <b>Gene</b> | <b>Gene Name</b>                                       | <b>DiffScore</b> |
|-------------|--------------------------------------------------------|------------------|
| Bmp3        | bone morphogenetic protein 3                           | -194.8           |
| BmpR1a      | bone morphogenetic protein receptor, type 1A           | -20.4            |
| Smad5       | MAD homolog 5                                          | -17.3            |
| Tgfr3       | transforming growth factor, beta receptor II           | -16.3            |
| Bmp4        | bone morphogenetic protein 4                           | -11.3            |
| Smad3       | MAD homolog 3                                          | -10.3            |
| Tgfr1       | transforming growth factor, beta receptor I            | -9.6             |
| Tgfr2       | transforming growth factor, beta receptor II           | -6.4             |
| Bmp6        | bone morphogenetic protein 6                           | -5.9             |
| Bmp8a       | bone morphogenetic protein 8a                          | -2.0             |
| TGFB1I1     | Transforming growth factor beta 1 induced transcript 1 | 3.4              |
| Bmp1        | bone morphogenetic protein 1                           | 3.6              |
| Tgfb1       | Transforming growth factor, beta 1                     | 4.3              |
| BMPER       | BMP binding endothelial regulator                      | 10.8             |
| Tgfb2       | Transforming growth factor, beta 2                     | 10.9             |
| Bmpr1b      | bone morphogenetic protein receptor, type 1B           | 11.2             |
| Tgfb3       | Transforming growth factor, beta 3                     | 69.4             |

## Supplemental Fig. 10

## HUMAN mRNA PRIMERS

| SEQUENCE                    | FORWARD PRIMER 5' TO 3' | REVERSE PRIMER 5' TO 3' |
|-----------------------------|-------------------------|-------------------------|
| <b>B-ACTIN</b>              | GGACTTCGAGCAAGAGATGG    | AGCACTGTGTGGCGTACAG     |
| <b>GATA4</b>                | TCCCTCTTCCCTCCTCAAAT    | TCAGCGTGTAAGGCATCTG     |
| <b>RUNX2</b>                | TTGCACTGGGTCATGTGT      | TGGCTGCATTGAAAAGACTG    |
| <b>COL1A1</b>               | ACGTCCTGGTGAAGTTGGTC    | ACCAGGGAAGCCTCTCTCTC    |
| <b>Alkaline phosphatase</b> | CCACGCTTTCACATTTGGTG    | AGACTGCGCCTGGTAGTTGT    |

## MOUSE mRNA PRIMERS

| SEQUENCE                     | FORWARD PRIMER 5' TO 3' | REVERSE PRIMER 5' TO 3' |
|------------------------------|-------------------------|-------------------------|
| <b>B-ACTIN</b>               | AGCCATGTACGTAGCCATCC    | CTCTCAGCTGTGGTGGTGAA    |
| <b>GATA4</b>                 | GTTGTGGTGGTGGGTTTTTC    | CCCAGGAAGCATTTCAGTAA    |
| <b>COL1A1</b>                | ACGTCCTGGTGAAGTTGGTC    | CAGGGAAGCCTCTTCTCCT     |
| <b>ALP1</b>                  | GTTGCCAAGCTGGGAAGAACAC  | CCCACCCCGCTATTCCAAAC    |
| <b>RUNX2</b>                 | CACGGTGACTCCCCTTACTT    | ATACGTGTGACCCAGTGCAA    |
| <b>ER<math>\alpha</math></b> | GCCAAGGAGACTCGCTACTG    | CTCCGGTTCTTGCAATGGT     |
| <b>FASL</b>                  | CTGGGTTGACTTCGTGTATTCC  | TGTCCAGTAGTGCAGTAGTTCAA |
| <b>EAP</b>                   | GACGCAGAGTCCCTTCAGAC    | CACCCCTACTCCCATACT      |
| <b>BSP</b>                   | AAAGTGAAGGAAAGCGACGA    | GTCCTTCTGCACCTGCTTC     |
| <b>OCN</b>                   | GGCCCTGAGTCTGACAAAGC    | GCGCCGGAGTCTGTTCACT     |
| <b>BMP4</b>                  | GCGGGACTTCGAGGCGACAC    | CGGGACGCTCCGGGTACTCA    |
| <b>BMP6</b>                  | GCGGTGACGGCTGCTGAGTT    | GCACGGGGTTGACGTGGAG     |
| <b>BMPR1A</b>                | CACCGAAAGCCCAGCTACGCA   | GGGGCAGTGTAGGCTGCAA     |
| <b>SMAD5</b>                 | TCACCTGCGAGCCACGCTTT    | TGCTTGGCTGTCTGGGCTG     |
| <b>TGFB1</b>                 | AGGGCTACCATGCCAACTTC    | CCACGTAGTAGACGATGGGC    |
| <b>TGFB2</b>                 | CTGCCTTCGCCCTCTTTACA    | CCCAGCACAGAAGTTAGCA     |
| <b>TGFB3</b>                 | ATGACCCACGTCCCCTATCA    | ACTCAGACTCCGAGGTCTCC    |
